# Supplementary material for: Public Attitudes and Concerns about Ammonia as an Energy Vector
Source: MDPI journal article supplement (doi:10.3390/en14217296), 2021-11-03
Supplement: s1 [file s1]

### S3. Demographic variables

In the case of climate change worry, a linear regression established that greater worry about climate change significantly predicted greater support for ammonia technologies in the UK,  $B = 0.153$  (0.044). Worry about climate change accounted for 3.1% of the variance, ( $F(1,351) = 12.20$ ,  $p = 0.001$ ). However, this was not the case for the Mexican sample,  $B = 0.086$  (0.049), where no significant relationship was found between variables. The dependant variable only accounted for a non-significant 0.4% of the variance in this country, ( $F(1, 559) = 3.142$ ,  $p = 0.077$ ).

For climate change threat (to themselves, their families, developing countries and developed countries) a significant result was found in both countries. Greater perception of threat significantly predicted support for this type of technologies; Mexico,  $B = 0.156$  (0.60), UK,  $B = 0.233$  (0.055). For the UK sample, climate change threat accounted for 4.6% of the variance, ( $F(1,349) = 17.966$ ,  $p < 0.001$ ), whereas in Mexico the explained variance was only 1.0 %, ( $F(1,558) = 6.825$ ,  $p < 0.01$ ).

Similar results were found for perception of risks/benefits of the technology. Data suggests that this independent variable highly predicts support for green ammonia technologies in both countries; Mexico,  $B = 0.613$  (0.043); UK,  $B = 0.475$  (0.055). Risks and benefits accounted for 26.5% of the variation in support for green ammonia technologies in Mexico, ( $F(1,555) = 201.419$ ,  $p < 0.001$ ), and 17.7% in the UK, ( $F(1,347) = 75.837$ ,  $p < 0.001$ ).
